# Supplementary material for: Genetic and Transcription Profile Analysis of Tissue-Specific Anthocyanin Pigmentation in Carrot Root Phloem
Source: Genes (Basel). 2021 Sep 22;12(10):1464. doi: 10.3390/genes12101464 (PMC8535259; doi:10.3390/genes12101464)
Supplement: Supplementary file 1 [file genes-12-01464-s001.zip › Supplementary Tables S1-S11 - Bannoud et at..xlsx]

## Sheet: List of tables
List of tables included in this file
Supplementary Table S1. Characteristics of the plant materials and sequencing libraries used for transcriptome (RNA-seq) analysis, and number of reads obtained for each sample.
Supplementary Table S2. Normalization factors for pair-wise transcriptome comparisons
Supplementary Table S3. Genes and primer sequences used for RT-qPCR analysis
Supplementary Table S4. Differentially expressed genes (DEGs) detected in pairwise transcriptome (RNA-Seq) comparisons of 'purple outer phloem (POP)' vs. 'non-purple inner phloem (NPIP)' in carrot roots varying in anthocyanin concentration and classified as dark purple (dP1, dP2), and pale purple (pP).
Suplementary Table S5. Differentially expressed genes (DEGs) identified in the P1, P3, and RIPAP regions of CHR 3 for each pair-wise transcriptome comparisons performed between purple outer phloem (POP) and non purple inner phloem (NPIP) tissues from carrot roots varying in anthocyanin concentration and classified as dark purple (dP1, dP2), and pale purple (pP).
Supplementary Table S6. Differentially expressed genes (DEGs) in the P1, P3, and RIPAP regions, consistently identidied in all the pairwise comparisons of purple outer phloem (POP) vs. non-purple inner phloem (NPIP)
Supplementary Table S7. Transcription factors consistently upregulated (red) or downregulated (green) in the root purple outer phloem (POP) across all the pairwise transcriptome comparisons between POP and non-purple inner phloem (NPIP).
Supplementary Table S8. Carrot DEGs belonging to the MYB, bHLH, Ethylene-responsive, NAC and WRKY transcription factor families consistenlty upregulated (in red) or downregulated (in green) in POP tissues across all the POP vs. NPIP transcriptome comparisons.
Supplementary Table S9. MYB, bHLH, ERF, NAC and WRKY transcription factor gene sequences from different plant species used for phylogenetic analysis
Supplementary Table S10. Structural genes involved the flavonoid and anthocyanin biosynthetic pathways annotated in the carrot genome sequence*. Genes in red were consistently upregulated in purple outer phloem (POP) in the three pairwise comparisons.
Supplementary Table S11. Summarized performance of 28 candidate genes for ROPAP and RIPAP across different gene expression and phylogenetic analyses performed in different carrot genetic backgrounds

## Sheet: ST1
Supplementary Table S1. Characteristics of the plant materials and sequencing libraries used for transcriptome (RNA-seq) analysis, and number of reads obtained for each sample.
Sample set†	sample name*	Population-generation§	Tissue sampled	Tissue color	Anthocyanin concentration	Number of cleaned reads	Type of library §
dP1	dP1_POP-1	7280-F2	outer phloem	purple	High (2.45 ± 0.79 mg/g fw)	12418051	Single-end
	dP1_POP-2	7280-F2	outer phloem	purple		13912152	Single-end
	dP1_POP-3	7280-F2	outer phloem	purple		12974183	Single-end
	dP1_NPIP-1	7280-F2	inner phloem	non-purple	No anthocyanins	12217538	Single-end
	dP1_NPIP-2	7280-F2	inner phloem	non-purple		13378490	Single-end
	dP1_NPIP-3	7280-F2	inner phloem	non-purple		13742641	Single-end
dP2	dP2_POP-1	60807-F2	outer phloem	purple	High (3.03 ± 0.7 mg/g fw)	13272471	Single-end
	dP2_POP-2	60807-F2	outer phloem	purple		13791116	Single-end
	dP2_POP-3	60807-F2	outer phloem	purple		13252475	Single-end
	dP2_NPIP-1	60807-F2	inner phloem	non-purple	No anthocyanins	13664420	Single-end
	dP2_NPIP-2	60807-F2	inner phloem	non-purple		14317944	Single-end
	dP2_NPIP-3	60807-F2	inner phloem	non-purple		13923206	Single-end
pP	pP_POP-1	7280-F2	outer phloem	purple	Low (0.14 ± 0.1 mg/g fw)	12032816	Single-end
	pP_POP-2	7280-F2	outer phloem	purple		10918928	Single-end
	pP_POP-3	7280-F2	outer phloem	purple		14197727	Single-end
	pP_NPIP-1	7280-F2	inner phloem	non-purple	No anthocyanins	13094863	Single-end
	pP_NPIP-2	7280-F2	inner phloem	non-purple		13832875	Single-end
	pP_NPIP-3	7280-F2	inner phloem	non-purple		13095837	Single-end
† Sample sets dP (dark purple), and pP (pale purple) correspond to purple roots with high and low anthocyanin content in the outer phloem, respectively.
* Sample names start with the sample set followed by the tissue and color phenotype, followed by the replicate number. POP: purple outer phloem; NPIP: non purple inner phloem.
§ All the F2 populations are sibbling families of 3242-F2 and share the same pedigree

## Sheet: ST2
Supplementary Table S2. Normalization factors for pair-wise transcriptome comparisons
Sample set†	Sample name*	Pair-wise comparisons
		dP_POP vs. dP_NPIP	mP_POP vs. mP_NPIP	pP_POP vs. pP_NPIP
dP1	dP1_POP-1	0.976009	-	-
	dP1_POP-2	0.999888	-	-
	dP1_POP-3	1.05833	-	-
	dP1_NPIP-1	0.946698	-	-
	dP1_NPIP-2	1.01015	-	-
	dP1_NPIP-3	1.01245	-	-
dP2	dP2_POP-1	-	0.966308	-
	dP2_POP-2	-	0.948597	-
	dP2_POP-3	-	0.970396	-
	dP2_NPIP-1	-	1.09292
	dP2_NPIP-2	-	1.03883	-
	dP2_NPIP-3	-	0.990193	-
pP	pP_POP-1	-	-	0.94328
	pP_POP-2	-	-	1.04716
	pP_POP-3	-	-	1.01097
	pP_NPIP-1	-	-	0.988678
	pP_NPIP-2	-	-	1.07334
	pP_NPIP-3	-	-	0.943662
† Sample sets dP (dark purple), and pP (pale purple) correspond to purple roots with high and low anthocyanin content in the outer phloem, respectively.
* Sample names start with the sample set followed by the tissue and color phenotype, followed by the replicate number. POP: purple outer phloem; NPIP: non purple inner phloem.
§ Normalization factors were calculated for each sample with the trimmed mean of M-values (TMM) in edgeR.
¥ Samples dP_POP: dark purple outer phloem, dP_NPIP: non-purple inner phloem of the dark purple set; pP_POP: pale purple outer phloem, pP_NPIP: non-purple inner phloem of the pale purple set

## Sheet: ST3
Supplementary Table S3. Genes and primer sequences used for RT-qPCR analysis
Gene name	DCAR/LOC Number	TF Family / Gene function	Primer sequence (5' - 3')
DcMYB7	DCAR_010745	MYB	Fwd	TGTTGTTAATGTCGTTGCCG
			Rev	CCTTCCCCGGACCTTATCAAA
DcMYB6	DCAR_000385	MYB	Fwd	CATCCATCTTCCGAATCAG
			Rev	TCATTAGAGGGACATTTAGTG
MYB (Chr. 1)	DCAR_003717	MYB	Fwd	AAAGTTGTCCCCGCAATGTC
			Rev	TCAGTGCCTCCACCTCTGAA
MYB (Chr. 8)	DCAR_028312	MYB	Fwd	TCCATCCGCACAATGCACCGA
			Rev	ACTCCCGGTCGGAATCGCAA
DcMYB12	DCAR_008994	MYB	Fwd	GGTGGAAGAATTTGTTTGCAGAA
			Rev	ATCCGCATTTTCTAAACCACTCG
DcbHLH3	DCAR_002739	bHLH	Fwd	AGGAAGACGGTAAATTCAGTGGAA
			Rev	CAAGGGGAAAAGAGAAAGAGACG
DcERF1	DCAR_016339	Ethylene responsive factor	Fwd	GCTCCCCAATCTTCTGTCCC
			Rev	AGCACTAGAGGGGTCGTACA
MADS-Box	DCAR_010757	MADS-Box	Fwd	ACCATCTTGAGGCAACAACTAC
			Rev	CCCTTGCAGGCTTATTTCCA
DcSCPL1/DcSAT1	LOC_108214129	Acyltransferase	Fwd	TTTCTGGATTCTCCGGTCGGT
			Rev	CTTCCTCAAGAACTGGAGGGCTAG
DcUCGXT1	DCAR_021269	UDP-glycosiltransferase	Fwd	TGGAGAAAGGAGAAGAAGATGGG
			Rev	TGATGAAGTTGTGGATGTAAGAGGA
DcUGalT1	DCAR_009912	UDP-glycosiltransferase	Fwd	ACCACCAGCATCACAATACTC
			Rev	TCCAGAGCTTCAGCCAATTC
DcGST1	DCAR_003401	Intracellular transport	Fwd	CACACTGGTACTTCAGCTCCTG
			Rev	CACCGCCCAGATATTTACTCTC
ABC transporter	DCAR_010639	Intracellular transport	Fwd	ATCGACCAGCTGCACCCCTT
			Rev	TGTGGGCTCCACCAGACGGAAT
MATE	DCAR_31151	Intracellular transport	Fwd	TGGAGACATTATGTGGACAAGC
			Rev	GGATTACACCAGTGCAGTTCAA
F3H	DCAR_009483	Flavanone 3-hydroxylase	Fwd	TGCAAGATTGGCGAGAGATAG
			Rev	CCATCAGCTTCTCACTGTACTC
F3H	DCAR_010572	Flavanone 3-hydroxylase	Fwd	TCAATGTCTCTGGCCTTCAAGT
			Rev	CGGTGAAACACACTCTGGTATTT
CHS	DCAR_030786	Chalcone synthase	Fwd	CCCTGTAATTGGGATCGAGAAG
			Rev	TTTGAGGAGGTGGAATGTTAGG
CHI	DCAR_027694	Chalcone isomerase	Fwd	TTTCCTGCCACGGTCAAA
			Rev	CAGAATCCTCCAGGTACACAC
Sucrose invertase	DCAR_009482	Sucrose invertase	Fwd	TGAGCAAGCCTCAGCAATAA
			Rev	GTATCGCAGCCTGTAACTATCC
Actin	DCAR_030967	Actin	Fwd	CGGTATTGTGTTGGACTCTGGTGAT
			Rev	CAGCAAGGTCAAGACGGAGTATGG

## Sheet: ST4
Supplementary Table S4 . Differentially expressed genes (DEGs) detected in pairwise transcriptome (RNA-Seq) comparisons of 'purple outer phloem (POP)' vs. 'non-purple inner phloem (NPIP)' in carrot roots varying in anthocyanin concentration and classified as dark purple (dP1, dP2), and pale purple (pP).
Transcriptome comparison†	Total DEGs	Upregulated	Downregulated	DEGs in P1 region§ (ROPAP)	DEGs in P3 region¥ (ROPAP)	DEGs in the RIPAP region*
dP1_POP vs. dP1_NPIP	3593	2253	1340	37	39	65
dP2_POP vs. dP2_NPIP	3149	2240	909	23	38	62
pP_POP vs. pP_NPIP	2007	1397	610	19	20	38
Consistently-DEGs across all comparisons	817	659	158	3	11	19
† Sample names start with the sample set (i.e., dP: dark purple; pP: pale purple) followed by the tissue and color phenotype (POP: purple outer phloem; NPIP: non-purple inner phloem).
§ P1 region spans 2.49 Mb of sequence in the region of 2.89-5.38 Mb of CHR 3, as defined by Bannoud et al. (2019)
¥ P3 region spans 3.6 Mb of sequence in the region of 26.3-29.9 Mb of CHR 3, as defined by Bannoud et al. (2019)
* The RIPAP (root inner phloem anthocyanin pigmentation) region spans 10.45 Mb of sequence in the region of 19.45-29.9 Mb of CHR3 and includes the 1.5 LOD support interval of the trait and the P3 region

## Sheet: ST5
Suplementary Table S5. Differentially expressed genes (DEGs) identified in the P1, P3, and RIPAP regions of CHR 3 for each pair-wise transcriptome comparisons performed between purple outer phloem (POP) and non purple inner phloem (NPIP) tissues from carrot roots varying in anthocyanin concentration and classified as dark purple (dP1, dP2), and pale purple (pP). Upregulated and downregulated gene…
Comparison	Region in CHR 3	Gene ID	logFC	logCPM	LR	P-value	FDR		Comparison	Region in CHR 3	Gene ID	logFC	logCPM	LR	P-value	FDR		Comparison	Region in CHR 3	Gene ID	logFC	logCPM	LR	P-value	FDR
dP1_POP vs. dP1_NPIP	P1	DCAR_008972	-6.59909	1.56094	46.8716	7.57939e-12	2.77442e-10		dP2_POP vs. dP2_NPIP	P1	DCAR_009125	-2.18371	3.73044	21.1845	4.17134e-06	6.23669e-05		pP_POP vs. pP_NPIP	P1	DCAR_008955	-3.54283	0.966414	24.2471	8.4736e-07	2.24131e-05
		DCAR_009193	-4.28394	4.39242	36.3806	1.62307e-09	3.93526e-08				DCAR_009060	-2.05862	4.7619	25.0358	5.62757e-07	1.00135e-05				DCAR_009155	-3.5015	4.84764	28.1187	1.14099e-07	3.70844e-06
		DCAR_008956	-2.54163	6.35954	18.1165	2.07789e-05	0.000228424				DCAR_009021	-1.11623	5.38728	11.0404	0.000891477	0.00734811				DCAR_009193	-3.41882	3.94545	24.4385	7.67183e-07	2.04768e-05
		DCAR_009101	-2.22543	5.93253	36.1749	1.80379e-09	4.32178e-08				DCAR_009049	1.1948	3.52015	8.27914	0.0040103	0.0267816				DCAR_008956	-3.10513	7.3393	15.6755	7.51915e-05	0.00121521
		DCAR_009100	-1.99759	1.94944	8.00534	0.00466395	0.0264948				DCAR_009201	1.54102	6.64758	18.6295	1.58741e-05	0.000208818				DCAR_009100	-2.54563	1.54792	11.2449	0.000798442	0.00956177
		DCAR_009045	-1.90757	4.34862	28.5295	9.22809e-08	1.60453e-06				DCAR_009155	1.56967	3.2106	12.4091	0.000427252	0.00391457				DCAR_009101	-2.24283	5.45164	30.9383	2.66366e-08	1.01565e-06
		DCAR_008955	-1.89696	0.586771	6.81227	0.00905336	0.045376				DCAR_008966	1.57269	4.83722	16.4165	5.08399e-05	0.000594052				DCAR_009190	1.14546	5.53354	9.39252	0.00217872	0.0223684
		DCAR_009060	-1.83412	4.97944	18.8664	1.40198e-05	0.000160764				DCAR_008963	1.59618	3.2996	11.9168	0.0005563	0.00487746				DCAR_008958	1.61255	2.93996	10.6651	0.00109174	0.0125535
		DCAR_008971	-1.82054	4.03667	16.4915	4.88687e-05	0.000493979				DCAR_009082	1.68732	9.21345	12.643	0.000376974	0.00349509				DCAR_009201	1.68827	4.53209	12.67	0.000371568	0.00492147
		DCAR_009155	-1.72362	5.51003	7.70783	0.0054982	0.0301735				DCAR_009199	1.69906	4.62584	20.867	4.92305e-06	7.23916e-05				DCAR_009007	1.92401	0.812422	9.78097	0.00176327	0.0187912
		DCAR_009122	-1.57646	5.54969	22.9677	1.64745e-06	2.27528e-05				DCAR_008956	1.8673	4.90131	23.7821	1.07881e-06	1.79345e-05				DCAR_009168	2.08929	1.00666	7.81008	0.00519555	0.0464357
		DCAR_009039	-1.20851	3.48913	9.43695	0.00212656	0.0137456				DCAR_009025	1.9541	2.52551	13.1464	0.000288068	0.00274907				DCAR_008981	2.20096	4.12017	13.9674	0.000186004	0.0026661
		DCAR_009024	-1.1782	3.99361	9.36891	0.00220696	0.0141435				DCAR_009066	2.12773	3.58181	15.8332	6.91778e-05	0.000781969				DCAR_008973	2.64057	3.23808	21.2667	3.99618e-06	8.99064e-05
		DCAR_009124	-1.15917	8.48814	10.7562	0.00103931	0.0073843				DCAR_009126	2.12776	2.36262	13.0196	0.000308254	0.00292162				DCAR_009074	2.68697	1.78904	12.4131	0.000426338	0.00551828
		DCAR_009001	-0.954255	5.4187	7.79334	0.00524391	0.0290889				DCAR_009184	2.50377	1.24777	16.0422	6.19453e-05	0.000708774				DCAR_008982	3.0567	3.9279	20.8652	4.92777e-06	0.000108509
		DCAR_009031	-0.933591	3.94262	7.0841	0.00777708	0.040167				DCAR_009118	3.02311	4.69343	33.7513	6.26258e-09	1.64648e-07				DCAR_009040	3.05861	2.49143	8.68165	0.00321431	0.0311288
		DCAR_009138	-0.919004	6.37316	7.42199	0.00644315	0.0344391				DCAR_009178	3.06078	1.60578	22.5347	2.06384e-06	3.2492e-05				DCAR_009118	3.70378	1.49524	23.3037	1.38334e-06	3.43709e-05
		DCAR_009172	-0.864488	6.72562	8.03649	0.00458442	0.026111				DCAR_008949	3.21246	1.3658	16.4172	5.08211e-05	0.000594052				DCAR_009117	4.29533	2.27891	33.1272	8.63209e-09	3.69983e-07
		DCAR_009082	0.865805	8.55234	6.77873	0.00922505	0.0459201				DCAR_008988	3.58439	0.991094	21.2438	4.04413e-06	6.05616e-05				DCAR_008950	4.76175	1.07209	31.1788	2.35321e-08	9.09084e-07
		DCAR_008960	1.10779	5.04442	9.2975	0.00229467	0.0146304				DCAR_009117	3.98179	4.24189	34.8126	3.6301e-09	9.94902e-08			P3	DCAR_010780	-2.614	2.43454	14.402	0.000147648	0.00218385
		DCAR_009028	1.15065	4.27706	9.98877	0.00157498	0.0106444				DCAR_008973	4.12592	2.69201	23.8199	1.05782e-06	1.7664e-05				DCAR_010679	-1.86337	0.447276	8.0153	0.00463838	0.0424246
		DCAR_009049	1.23684	3.73555	8.64136	0.00328616	0.0198497				DCAR_009020	5.89045	6.45132	24.9814	5.78859e-07	1.0261e-05				DCAR_010690	-1.81649	2.13927	8.52412	0.0035047	0.0334991
		DCAR_008953	1.24913	3.54641	9.79467	0.00175018	0.0116436				DCAR_009042	6.04313	3.56712	78.8356	6.74999e-19	9.43755e-17				DCAR_010718	-1.58928	3.80949	12.7287	0.000360079	0.00479452
		DCAR_009190	1.29383	5.11879	10.6103	0.00112459	0.00791612			P3	DCAR_010690	-2.28108	4.90308	27.3842	1.66784e-07	3.33194e-06				DCAR_010646	-1.31282	6.79826	11.2279	0.000805749	0.00963616
		DCAR_009010	1.37887	5.54866	11.7681	0.000602554	0.0046014				DCAR_010780	-2.1272	4.50153	12.8778	0.00033251	0.00312149				DCAR_010771	1.23372	5.73988	12.5856	0.000388724	0.00509885
		DCAR_009074	1.71677	1.83416	8.1815	0.00423198	0.0244952				DCAR_010870	-1.3973	4.49084	12.1177	0.000499462	0.0044651				DCAR_010639	1.27529	4.76852	9.96582	0.00159473	0.0172364
		DCAR_009201	1.83089	4.96092	26.082	3.27218e-07	5.19767e-06				DCAR_010718	-1.0815	4.19972	7.87867	0.00500212	0.0322656				DCAR_010757	1.66984	3.42247	11.661	0.000638253	0.00785707
		DCAR_008995	1.92119	2.58648	13.9282	0.000189925	0.00166192				DCAR_010658	-1.01657	4.98166	8.63618	0.00329551	0.022713				DCAR_010645	1.8902	3.48187	14.9359	0.000111225	0.00170229
		DCAR_009037	1.94834	2.84119	9.29455	0.00229837	0.0146486				DCAR_010862	1.08599	6.29361	8.22178	0.00413907	0.0275335				DCAR_010760	1.92668	3.08713	17.7926	2.46334e-05	0.000461149
		DCAR_009178	2.07677	1.76803	13.6052	0.000225559	0.00193398				DCAR_010772	1.23649	4.54633	11.6653	0.000636764	0.00547321				DCAR_010745	2.31502	1.13189	12.5323	0.000399983	0.00522708
		DCAR_009025	2.22452	1.78729	12.0805	0.000509522	0.00398152				DCAR_010730	1.48819	3.83759	10.3905	0.00126667	0.0098713				DCAR_010706	2.38157	0.452477	10.2856	0.00134069	0.0149479
		DCAR_009154	2.29733	6.10556	13.9204	0.000190717	0.00166551				DCAR_010699	1.62032	2.90021	10.8743	0.000975071	0.00794617				DCAR_010764	2.40758	3.13748	8.43129	0.00368818	0.0348557
		DCAR_009066	2.73032	2.05617	16.1307	5.91177e-05	0.000583061				DCAR_010648	1.62068	3.12278	10.5386	0.00116905	0.00924911				DCAR_010711	2.4732	2.75321	10.9141	0.000954328	0.0111927
		DCAR_009126	4.51816	1.87258	24.266	8.39085e-07	1.21762e-05				DCAR_010645	1.72507	4.37467	15.8566	6.83273e-05	0.000774224				DCAR_010795	2.74145	1.62163	17.2581	3.26309e-05	0.000582989
		DCAR_008981	4.57155	3.94039	46.8013	7.85627e-12	2.85723e-10				DCAR_010827	1.8041	1.15703	7.13885	0.00754314	0.0456367				DCAR_010869	3.37156	2.62896	17.7856	2.47252e-05	0.000461887
		DCAR_009118	7.8186	0.93255	45.9941	1.18608e-11	4.15772e-10				DCAR_010691	1.83706	7.82395	11.9398	0.000549463	0.00482881				DCAR_000385	3.87438	1.13274	15.2864	9.23771e-05	0.00143883
		DCAR_009117	9.41728	2.41266	67.4542	2.15635e-16	1.73472e-14				DCAR_010758	1.84596	1.75609	11.3274	0.00076373	0.00643107				DCAR_010700	4.38104	5.13643	118.715	1.20883e-27	1.25264e-24
	P3	DCAR_010780	-4.69668	3.74373	83.1256	7.70038e-20	1.00318e-17				DCAR_010639	1.90711	4.58963	26.3159	2.89895e-07	5.54861e-06				DCAR_010849	5.43293	0.487304	30.4797	3.37387e-08	1.25653e-06
		DCAR_010691	-3.93642	2.29391	44.6093	2.40552e-11	8.09117e-10				DCAR_010628	1.93655	3.36307	17.5379	2.81634e-05	0.000352401				DCAR_010688	7.23208	2.08205	50.1338	1.43608e-12	1.2649e-10
		DCAR_010690	-2.63117	2.71115	27.5092	1.56347e-07	2.63197e-06				DCAR_010795	1.95937	3.59503	8.54655	0.00346177	0.0237105			RIPAP	DCAR_010780	-2.614	2.43454	14.402	0.000147648	0.00218385
		DCAR_010828	-2.04019	0.869076	7.68212	0.00557706	0.0305391				DCAR_010700	2.00859	6.00031	32.9354	9.52747e-09	2.38748e-07				DCAR_010471	-2.08002	1.90741	11.51	0.000692226	0.00842727
		DCAR_010679	-2.04005	2.49976	18.0426	2.16015e-05	0.000236573				DCAR_010774	2.15247	1.7975	11.7889	0.000595836	0.00515648				DCAR_010573	-2.04651	4.17757	20.5797	5.71982e-06	0.000124089
		DCAR_010818	-1.97213	1.32721	12.7142	0.00036289	0.0029465				DCAR_010835	2.21557	3.3641	23.1493	1.499e-06	2.42732e-05				DCAR_010679	-1.86337	0.447276	8.0153	0.00463838	0.0424246
		DCAR_010718	-1.96906	2.9378	19.545	9.82556e-06	0.000116525				DCAR_010745	2.27285	0.809683	10.7649	0.00103446	0.00832503				DCAR_010690	-1.81649	2.13927	8.52412	0.0035047	0.0334991
		DCAR_010646	-1.83573	6.5426	18.8366	1.42405e-05	0.000162694				DCAR_010743	2.49827	3.76138	16.2134	5.65934e-05	0.000652725				DCAR_010718	-1.58928	3.80949	12.7287	0.000360079	0.00479452
		DCAR_010816	-1.60021	5.16315	23.4212	1.30135e-06	1.82325e-05				DCAR_010708	2.84749	2.09387	23.3299	1.36465e-06	2.22516e-05				DCAR_010874	-1.56498	7.26833	17.3092	3.17645e-05	0.00056924
		DCAR_010839	-1.13262	4.17695	10.13	0.00145875	0.00996688				DCAR_010791	2.89853	0.865063	17.4276	2.98463e-05	0.000370978				DCAR_010646	-1.31282	6.79826	11.2279	0.000805749	0.00963616
		DCAR_010859	-0.854563	5.76523	6.81106	0.00905948	0.0453936				DCAR_010869	2.94133	3.73529	36.3715	1.63073e-09	4.81477e-08				DCAR_010549	-1.19414	5.07178	8.77269	0.00305775	0.0298365
		DCAR_010772	1.13791	5.56125	9.99811	0.00156701	0.0106069				DCAR_010850	3.00346	3.01672	9.18394	0.00244148	0.0175073				DCAR_010405	-0.997325	6.25095	8.43508	0.00368051	0.0348018
		DCAR_010752	1.22868	4.16841	12.0983	0.000504678	0.00394544				DCAR_010707	3.22696	1.86905	29.4383	5.77254e-08	1.26826e-06				DCAR_000385	3.87438	1.13274	15.2864	9.23771e-05	0.00143883
		DCAR_010712	1.23582	3.35919	8.98154	0.0027272	0.0169849				DCAR_010846	3.33177	4.88925	17.5253	2.83515e-05	0.000354044				DCAR_010295	1.81944	3.00709	10.6392	0.00110717	0.0126979
		DCAR_010771	1.23856	5.65338	9.3903	0.00218137	0.0140155				DCAR_010624	3.44544	4.61971	13.6115	0.000224808	0.00221834				DCAR_010303	2.93087	4.3329	20.8748	4.90295e-06	0.000108098
		DCAR_010639	1.36544	4.15056	6.76588	0.00929169	0.0461441				DCAR_000385	3.47176	1.48632	19.944	7.97444e-06	0.00011232				DCAR_010318	2.1461	4.80453	14.3192	0.000154284	0.00225924
		DCAR_010755	1.50122	2.55868	10.9896	0.000916263	0.00661232				DCAR_010849	4.14046	0.0357699	20.5416	5.83505e-06	8.4606e-05				DCAR_010324	2.71956	3.64367	24.6752	6.78511e-07	1.84454e-05
		DCAR_010661	1.84316	4.0586	20.9254	4.77524e-06	6.06706e-05				DCAR_010642	4.27003	2.68178	40.2027	2.28934e-10	8.01013e-09				DCAR_010421	1.53271	4.0929	12.1668	0.000486481	0.00619656
		DCAR_010862	1.90062	4.46053	27.4062	1.64905e-07	2.77069e-06				DCAR_010757	4.58889	2.57101	58.7307	1.80794e-14	1.30165e-12				DCAR_010446	2.1015	6.34915	14.7783	0.000120922	0.00183318
		DCAR_010645	1.92862	2.79868	17.7841	2.47438e-05	0.000266967				DCAR_010688	4.97792	4.32739	27.7972	1.3472e-07	2.7561e-06				DCAR_010467	1.90803	2.61895	14.4246	0.000145885	0.00216322
		DCAR_010648	2.12753	0.95905	11.1815	0.000826168	0.00604207				DCAR_010807	5.2099	3.54537	64.6634	8.88511e-16	7.77198e-14				DCAR_010478	2.02185	4.83152	22.1572	2.51213e-06	5.93213e-05
		DCAR_010760	2.44721	1.92826	7.99579	0.00468864	0.0265918				DCAR_010770	6.82099	1.64303	55.3845	9.91135e-14	6.3976e-12				DCAR_010498	6.95964	1.82952	53.1024	3.16608e-13	3.28081e-11
		DCAR_010743	2.5421	2.01474	12.052	0.000517371	0.00402843				DCAR_010769	6.87881	1.69988	51.9479	5.6994e-13	3.25265e-11				DCAR_010529	2.70708	2.28486	16.913	3.91326e-05	0.000687297
		DCAR_010710	2.67988	1.49736	17.5191	2.84441e-05	0.000304072			RIPAP	DCAR_010690	-2.28108	4.90308	27.3842	1.66784e-07	3.33194e-06				DCAR_010563	1.40819	5.18363	13.9792	0.000184849	0.00265387
		DCAR_010757	2.89215	3.46624	41.6139	1.11199e-10	3.29576e-09				DCAR_010780	-2.1272	4.50153	12.8778	0.00033251	0.00312149				DCAR_010572	2.80258	6.12733	20.6975	5.37866e-06	0.00011712
		DCAR_010711	3.20019	3.16836	44.191	2.97846e-11	9.78526e-10				DCAR_010471	-2.06514	1.77904	7.55636	0.00597985	0.0375501				DCAR_010578	2.67096	3.80893	28.3061	1.03567e-07	3.41421e-06
		DCAR_000385	3.28409	2.67927	9.51395	0.00203916	0.0132777				DCAR_010573	-2.00526	4.16329	15.6614	7.57527e-05	0.000845063				DCAR_010639	1.27529	4.76852	9.96582	0.00159473	0.0172364
		DCAR_000385	3.28409	2.67927	9.51395	0.00203916	0.0132777				DCAR_010595	-1.5978	5.43351	23.3879	1.3241e-06	2.1628e-05				DCAR_010645	1.8902	3.48187	14.9359	0.000111225	0.00170229
		DCAR_010764	3.43311	2.51443	35.6501	2.36137e-09	5.54065e-08				DCAR_010456	-1.46707	3.97268	12.0627	0.000514403	0.0045744				DCAR_010688	7.23208	2.08205	50.1338	1.43608e-12	1.2649e-10
		DCAR_010745	3.52299	3.32124	13.6735	0.000217503	0.00187226				DCAR_010870	-1.3973	4.49084	12.1177	0.000499462	0.0044651				DCAR_010700	4.38104	5.13643	118.715	1.20883e-27	1.25264e-24
		DCAR_010774	4.19306	1.61369	40.8852	1.61442e-10	4.63534e-09				DCAR_010462	-1.15528	7.99205	8.85095	0.00292936	0.0205066				DCAR_010706	2.38157	0.452477	10.2856	0.00134069	0.0149479
		DCAR_010642	4.38755	1.38916	28.5955	8.91886e-08	1.55386e-06				DCAR_010453	-1.08152	4.41371	7.7957	0.00523708	0.0334584				DCAR_010711	2.4732	2.75321	10.9141	0.000954328	0.0111927
		DCAR_010709	4.85209	0.0564648	27.1402	1.89224e-07	3.13466e-06				DCAR_010718	-1.0815	4.19972	7.87867	0.00500212	0.0322656				DCAR_010745	2.31502	1.13189	12.5323	0.000399983	0.00522708
		DCAR_010624	5.39663	2.50173	54.0236	1.98094e-13	1.0082e-11				DCAR_010658	-1.01657	4.98166	8.63618	0.00329551	0.022713				DCAR_010757	1.66984	3.42247	11.661	0.000638253	0.00785707
		DCAR_010869	6.13599	1.84431	50.7216	1.06442e-12	4.66874e-11				DCAR_010550	0.94689	6.10454	9.80778	0.00173776	0.0130905				DCAR_010760	1.92668	3.08713	17.7926	2.46334e-05	0.000461149
		DCAR_010641	6.21778	4.36254	68.6464	1.17797e-16	9.88644e-15				DCAR_010579	0.968598	6.8008	8.72911	0.0031317	0.0217442				DCAR_010764	2.40758	3.13748	8.43129	0.00368818	0.0348557
		DCAR_010850	7.45757	0.614566	36.7158	1.36665e-09	3.38405e-08				DCAR_010862	1.08599	6.29361	8.22178	0.00413907	0.0275335				DCAR_010771	1.23372	5.73988	12.5856	0.000388724	0.00509885
		DCAR_010700	9.95419	4.77381	217.481	3.2055e-49	1.39896e-45				DCAR_010502	1.08678	5.97494	9.69637	0.00184633	0.013797				DCAR_010795	2.74145	1.62163	17.2581	3.26309e-05	0.000582989
		DCAR_010688	11.6	4.54852	78.9898	6.24305e-19	7.36385e-17				DCAR_010772	1.23649	4.54633	11.6653	0.000636764	0.00547321				DCAR_010849	5.43293	0.487304	30.4797	3.37387e-08	1.25653e-06
	RIPAP	DCAR_010780	-4.69668	3.74373	83.1256	7.70038e-20	1.00318e-17				DCAR_010730	1.48819	3.83759	10.3905	0.00126667	0.0098713				DCAR_010869	3.37156	2.62896	17.7856	2.47252e-05	0.000461887
		DCAR_010691	-3.93642	2.29391	44.6093	2.40552e-11	8.09117e-10				DCAR_010572	1.50477	5.96321	15.2786	9.27599e-05	0.00101011
		DCAR_010573	-2.69016	4.3642	36.3711	1.63101e-09	3.94903e-08				DCAR_010604	1.55461	6.2847	20.8769	4.89757e-06	7.20737e-05
		DCAR_010690	-2.63117	2.71115	27.5092	1.56347e-07	2.63197e-06				DCAR_010475	1.57449	5.20721	8.1407	0.00432825	0.0285988
		DCAR_010874	-2.43944	8.27562	49.0748	2.46382e-12	1.00258e-10				DCAR_010433	1.61737	3.65517	14.612	0.000132074	0.00138635
		DCAR_010828	-2.04019	0.869076	7.68212	0.00557706	0.0305391				DCAR_010699	1.62032	2.90021	10.8743	0.000975071	0.00794617
		DCAR_010679	-2.04005	2.49976	18.0426	2.16015e-05	0.000236573				DCAR_010648	1.62068	3.12278	10.5386	0.00116905	0.00924911
		DCAR_010471	-2.02346	2.40261	10.472	0.00121197	0.00845277				DCAR_010548	1.72258	3.4481	11.2528	0.000795012	0.00663183
		DCAR_010818	-1.97213	1.32721	12.7142	0.00036289	0.0029465				DCAR_010645	1.72507	4.37467	15.8566	6.83273e-05	0.000774224
		DCAR_010718	-1.96906	2.9378	19.545	9.82556e-06	0.000116525				DCAR_010827	1.8041	1.15703	7.13885	0.00754314	0.0456367
		DCAR_010646	-1.83573	6.5426	18.8366	1.42405e-05	0.000162694				DCAR_010508	1.81245	5.25295	31.0048	2.57394e-08	6.09796e-07
		DCAR_010816	-1.60021	5.16315	23.4212	1.30135e-06	1.82325e-05				DCAR_010691	1.83706	7.82395	11.9398	0.000549463	0.00482881
		DCAR_010549	-1.58997	5.21059	18.6697	1.55437e-05	0.000176313				DCAR_010758	1.84596	1.75609	11.3274	0.00076373	0.00643107
		DCAR_010839	-1.13262	4.17695	10.13	0.00145875	0.00996688				DCAR_010639	1.90711	4.58963	26.3159	2.89895e-07	5.54861e-06
		DCAR_010405	-1.0295	5.7905	9.78014	0.00176407	0.0117271				DCAR_010307	1.93453	1.29845	8.4401	0.00367035	0.0248932
		DCAR_010492	-0.962294	5.58007	6.5867	0.0102743	0.0499561				DCAR_010628	1.93655	3.36307	17.5379	2.81634e-05	0.000352401
		DCAR_010567	-0.939756	5.87057	8.00652	0.00466093	0.0264868				DCAR_010795	1.95937	3.59503	8.54655	0.00346177	0.0237105
		DCAR_010859	-0.854563	5.76523	6.81106	0.00905948	0.0453936				DCAR_010700	2.00859	6.00031	32.9354	9.52747e-09	2.38748e-07
		DCAR_010560	-0.838995	5.83602	7.16876	0.0074184	0.0387038				DCAR_010484	2.10533	3.48803	14.3967	0.000148065	0.00153468
		DCAR_010546	-0.816153	6.57245	6.78469	0.00919431	0.0458586				DCAR_010774	2.15247	1.7975	11.7889	0.000595836	0.00515648
		DCAR_010403	0.830014	6.0215	6.72461	0.00950913	0.0469327				DCAR_010563	2.20916	3.15463	20.7548	5.22002e-06	7.63386e-05
		DCAR_010571	0.888503	8.21863	6.94511	0.00840486	0.0427392				DCAR_010835	2.21557	3.3641	23.1493	1.499e-06	2.42732e-05
		DCAR_010772	1.13791	5.56125	9.99811	0.00156701	0.0106069				DCAR_010745	2.27285	0.809683	10.7649	0.00103446	0.00832503
		DCAR_010752	1.22868	4.16841	12.0983	0.000504678	0.00394544				DCAR_010743	2.49827	3.76138	16.2134	5.65934e-05	0.000652725
		DCAR_010712	1.23582	3.35919	8.98154	0.0027272	0.0169849				DCAR_010529	2.50583	3.37335	15.439	8.52097e-05	0.000939364
		DCAR_010771	1.23856	5.65338	9.3903	0.00218137	0.0140155				DCAR_010571	2.55515	8.03304	32.9764	9.32861e-09	2.34392e-07
		DCAR_010548	1.32414	3.48277	12.1541	0.00048979	0.00384454				DCAR_010312	2.57276	3.30382	25.6395	4.11526e-07	7.53753e-06
		DCAR_010439	1.33288	1.64111	6.58594	0.0102787	0.0499561				DCAR_010708	2.84749	2.09387	23.3299	1.36465e-06	2.22516e-05
		DCAR_010639	1.36544	4.15056	6.76588	0.00929169	0.0461441				DCAR_010791	2.89853	0.865063	17.4276	2.98463e-05	0.000370978
		DCAR_010755	1.50122	2.55868	10.9896	0.000916263	0.00661232				DCAR_010869	2.94133	3.73529	36.3715	1.63073e-09	4.81477e-08
		DCAR_010467	1.70758	2.39497	9.93324	0.00162321	0.010907				DCAR_010850	3.00346	3.01672	9.18394	0.00244148	0.0175073
		DCAR_010572	1.80172	2.3274	11.0013	0.000910489	0.00657881				DCAR_010707	3.22696	1.86905	29.4383	5.77254e-08	1.26826e-06
		DCAR_010556	1.82676	2.20375	8.32863	0.00390251	0.0229535				DCAR_010846	3.33177	4.88925	17.5253	2.83515e-05	0.000354044
		DCAR_010661	1.84316	4.0586	20.9254	4.77524e-06	6.06706e-05				DCAR_010624	3.44544	4.61971	13.6115	0.000224808	0.00221834
		DCAR_010862	1.90062	4.46053	27.4062	1.64905e-07	2.77069e-06				DCAR_010578	3.47112	3.60258	51.0767	8.88254e-13	4.93389e-11
		DCAR_010645	1.92862	2.79868	17.7841	2.47438e-05	0.000266967				DCAR_000385	3.47176	1.48632	19.944	7.97444e-06	0.00011232
		DCAR_010648	2.12753	0.95905	11.1815	0.000826168	0.00604207				DCAR_010377	3.68482	1.5302	17.1566	3.44219e-05	0.000420865
		DCAR_010760	2.44721	1.92826	7.99579	0.00468864	0.0265918				DCAR_010849	4.14046	0.0357699	20.5416	5.83505e-06	8.4606e-05
		DCAR_010519	2.54076	1.43385	14.2847	0.000157139	0.00140965				DCAR_010642	4.27003	2.68178	40.2027	2.28934e-10	8.01013e-09
		DCAR_010743	2.5421	2.01474	12.052	0.000517371	0.00402843				DCAR_010757	4.58889	2.57101	58.7307	1.80794e-14	1.30165e-12
		DCAR_010710	2.67988	1.49736	17.5191	2.84441e-05	0.000304072				DCAR_010446	4.92053	6.12805	75.7378	3.23948e-18	3.92796e-16
		DCAR_010295	2.8729	2.96843	33.2054	8.29192e-09	1.8004e-07				DCAR_010688	4.97792	4.32739	27.7972	1.3472e-07	2.7561e-06
		DCAR_010475	2.87985	4.70509	26.1194	3.20945e-07	5.10267e-06				DCAR_010807	5.2099	3.54537	64.6634	8.88511e-16	7.77198e-14
		DCAR_010757	2.89215	3.46624	41.6139	1.11199e-10	3.29576e-09				DCAR_010498	6.32744	4.46899	63.2863	1.7874e-15	1.50713e-13
		DCAR_010563	2.91368	5.11394	58.6939	1.84215e-14	1.11007e-12				DCAR_010770	6.82099	1.64303	55.3845	9.91135e-14	6.3976e-12
		DCAR_010711	3.20019	3.16836	44.191	2.97846e-11	9.78526e-10				DCAR_010769	6.87881	1.69988	51.9479	5.6994e-13	3.25265e-11
		DCAR_010318	3.25468	4.91484	32.8163	1.0129e-08	2.16429e-07
		DCAR_010764	3.43311	2.51443	35.6501	2.36137e-09	5.54065e-08
		DCAR_010745	3.52299	3.32124	13.6735	0.000217503	0.00187226
		DCAR_010578	3.73854	3.77395	59.8069	1.04637e-14	6.57068e-13
		DCAR_000385	3.28409	2.67927	9.51395	0.00203916	0.0132777
		DCAR_010529	3.84981	2.20379	34.3487	4.60699e-09	1.04719e-07
		DCAR_010478	4.17874	4.86726	113.739	1.48652e-26	4.32504e-24
		DCAR_010774	4.19306	1.61369	40.8852	1.61442e-10	4.63534e-09
		DCAR_010642	4.38755	1.38916	28.5955	8.91886e-08	1.55386e-06
		DCAR_010709	4.85209	0.0564648	27.1402	1.89224e-07	3.13466e-06
		DCAR_010446	5.32476	7.49802	99.5204	1.94153e-23	4.13332e-21
		DCAR_010624	5.39663	2.50173	54.0236	1.98094e-13	1.0082e-11
		DCAR_010869	6.13599	1.84431	50.7216	1.06442e-12	4.66874e-11
		DCAR_010641	6.21778	4.36254	68.6464	1.17797e-16	9.88644e-15
		DCAR_010303	6.95986	4.88609	77.4258	1.37806e-18	1.52259e-16
		DCAR_010850	7.45757	0.614566	36.7158	1.36665e-09	3.38405e-08
		DCAR_010498	9.40451	2.39907	69.2469	8.68768e-17	7.43435e-15
		DCAR_010700	9.95419	4.77381	217.481	3.2055e-49	1.39896e-45
		DCAR_010688	11.6	4.54852	78.9898	6.24305e-19	7.36385e-17

## Sheet: ST6
Supplementary Table S6. Differentially expressed genes (DEGs) in the P1, P3, and RIPAP regions, consistently identified in all of the pairwise comparisons of purple outer phloem (POP) vs. non-purple inner phloem (NPIP)
Region in CHR 3	Gene ID	Position in CHR 3		Description *
		start	end
P1§ (ROPAP)	DCAR_009117	4513181	4515836	Glycerophosphodiester phosphodiesterase protein kinase domain-containing GDPDL2 {ECO:0000305} (3.1.4.46 {ECO:0000250|UniProtKB:Q7Y208}) (Glycerophosphodiester phosphodiesterase-like 2 {ECO:0000303|PubMed:21323773}) (ATGDPDL2 {ECO:0000303|PubMed:21323773}) (Protein SUPPRESSOR OF NPR1-1 CONSTITUTIVE 4 {ECO:0000303|PubMed:20508139}) (Precursor)
	DCAR_009118	4516578	4518462	Glycerophosphodiester phosphodiesterase protein kinase domain-containing GDPDL2 {ECO:0000305} (3.1.4.46 {ECO:0000250|UniProtKB:Q7Y208}) (Glycerophosphodiester phosphodiesterase-like 2 {ECO:0000303|PubMed:21323773}) (ATGDPDL2 {ECO:0000303|PubMed:21323773}) (Protein SUPPRESSOR OF NPR1-1 CONSTITUTIVE 4 {ECO:0000303|PubMed:20508139}) (Precursor)
	DCAR_009201	5345986	5350047	Nudix hydrolase 19, chloroplastic (AtNUDT19) (3.6.1.22) (NADH pyrophosphatase NUDT19) (Precursor)
P3¥ (ROPAP)	DCAR_010639	26593195	26599648	ABC transporter C family member 10 (ABC transporter ABCC.10) (AtABCC10) (3.6.3.44) (ATP-energized glutathione S-conjugate pump 14) (Glutathione S-conjugate-transporting ATPase 14) (Multidrug resistance-associated protein 14)
	DCAR_010645	26620833	26625680	Plastidial pyruvate kinase 2 (PKp2) (2.7.1.40) (Plastidial pyruvate kinase 1) (PKP1) (Pyruvate kinase III) (Pyruvate kinase isozyme B1, chloroplastic) (PKP-BETA1) (Plastidic pyruvate kinase beta subunit 1) (Precursor)
	DCAR_010688	27128468	27129926	Cationic peroxidase 1 (1.11.1.7) (PNPC1) (Precursor)
	DCAR_010690	27167233	27168756	Ribose-phosphate pyrophosphokinase 4 (2.7.6.1) (Phosphoribosyl pyrophosphate synthase 4)
	DCAR_010700	27312869	27314685	Pathogen-related protein
	DCAR_010718	27444038	27455244	Protein DETOXIFICATION 14 {ECO:0000303|PubMed:11739388} (AtDTX14 {ECO:0000303|PubMed:11739388}) (Multidrug and toxic compound extrusion protein 14 {ECO:0000305}) (MATE protein 14 {ECO:0000305})
	DCAR_010745	27816911	27819103	Transcription factor MYB113 (Myb-related protein 113) (AtMYB113) - DcMYB7 (Iorizzo et al. 2019; Xu et al. 2019)
	DCAR_010757	28112767	28119898	MADS-box transcription factor 27 (OsMADS27) (RMADS218) - MADS-box (Bannoud et al. 2019)
	DCAR_010780	28546467	28547659	Probable xyloglucan endotransglucosylase/hydrolase protein 7 (At-XTH7) (XTH-7) (2.4.1.207) (Precursor)
	DCAR_010869	29775396	29777550	Protein IRX15-LIKE
	DCAR_0003851	1976	3967	Transcription factor MYB113 (Myb-related protein 113) (AtMYB113) - DcMYB6 (Xu et al. 2017; Iorizzo et al. 2019)
RIPAP†	DCAR_010446	23195242	23199804	Aldehyde dehydrogenase family 2 member C4 (1.2.1.3) (ALDH1a) (Protein REDUCED EPIDERMAL FLUORESCENCE 1)
	DCAR_010471	23792388	23793244	Developmental protein SEPALLATA 3 (Agamous-like MADS-box protein AGL9)
	DCAR_010498	24144232	24148933	Mechanosensitive ion channel protein 10 (Mechanosensitive channel of small conductance-like 10) (MscS-Like protein 10) (AtMSL10)
	DCAR_010529	24967968	24968960	Inositol-tetrakisphosphate 1-kinase 1 (2.7.1.134) (Inositol 1,3,4-trisphosphate 5/6-kinase 1) (Inositol-triphosphate 5/6-kinase 1) (Ins(1,3,4)P(3) 5/6-kinase 1) (2.7.1.159) (Low phytic acid protein 2) (ZmIpk)
	DCAR_010563	25451216	25453926	UNC93-like protein 2
	DCAR_010572	25684635	25689703	Flavanone 3-hydroxylase (F3H) (1.14.11.9)
	DCAR_010573	25723695	25724321	Protein YLS9 (Protein NDR1/HIN1-LIKE 10) (AtNHL10) (Protein YELLOW-LEAF-SPECIFIC GENE 9)
	DCAR_010578	25751673	25755846	CDPK-related kinase 4 (AtCRK4) (2.7.11.1) (Calcium/calmodulin-dependent protein kinase CRK4)
	DCAR_010639	26593195	26599648	ABC transporter C family member 10 (ABC transporter ABCC.10) (AtABCC10) (3.6.3.44) (ATP-energized glutathione S-conjugate pump 14) (Glutathione S-conjugate-transporting ATPase 14) (Multidrug resistance-associated protein 14)
	DCAR_010645	26620833	26625680	Plastidial pyruvate kinase 2 (PKp2) (2.7.1.40) (Plastidial pyruvate kinase 1) (PKP1) (Pyruvate kinase III) (Pyruvate kinase isozyme B1, chloroplastic) (PKP-BETA1) (Plastidic pyruvate kinase beta subunit 1) (Precursor)
	DCAR_010688	27128468	27129926	Cationic peroxidase 1 (1.11.1.7) (PNPC1) (Precursor)
	DCAR_010690	27167233	27168756	Ribose-phosphate pyrophosphokinase 4 (2.7.6.1) (Phosphoribosyl pyrophosphate synthase 4)
	DCAR_010700	27312869	27314685	Pathogen-related protein
	DCAR_010718	27444038	27455244	Protein DETOXIFICATION 14 {ECO:0000303|PubMed:11739388} (AtDTX14 {ECO:0000303|PubMed:11739388}) (Multidrug and toxic compound extrusion protein 14 {ECO:0000305}) (MATE protein 14 {ECO:0000305})
	DCAR_010745	27816911	27819103	Transcription factor MYB113 (Myb-related protein 113) (AtMYB113) - DcMYB7 (Iorizzo et al. 2019; Xu et al. 2019)
	DCAR_010757	28112767	28119898	MADS-box transcription factor 27 (OsMADS27) (RMADS218)
	DCAR_010780	28546467	28547659	Probable xyloglucan endotransglucosylase/hydrolase protein 7 (At-XTH7) (XTH-7) (2.4.1.207) (Precursor)
	DCAR_010869	29775396	29777550	Protein IRX15-LIKE
	DCAR_000385	1976	3967	Transcription factor MYB113 (Myb-related protein 113) (AtMYB113) - DcMYB6 (Xu et al. 2017; Iorizzo et al. 2019)
§ P1 region spans 2.49 Mb of sequence in the region of 2.89-5.38 Mb of CHR 3, as defined by Bannoud et al. (2019)
¥ P3 region spans 3.6 Mb of sequence in the region of 26.3-29.9 Mb of CHR 3, as defined by Bannoud et al. (2019)
† The RIPAP (root inner phloem anthocyanin pigmentation) region spans 10.45 Mb of sequence in the region of 19.45-29.9 Mb of CHR3 and includes the 1.5 LOD support interval of the trait and the P3 region
* Descriptions correspond to the top Blastp hits in Swiss-Prot database. Carrot genes previously described (and their reference) are indicated in blue.
Genes upregulated in POP are denoted in red
Genes downregulated in POP are denoted in green
 For DCAR_000385 a contig containing this gene was included in the carrot genome assembly (Iorizzo et al. 2018)

## Sheet: ST7
Supplementary Table S7 . Transcription factors consistently upregulated (red) or downregulated (green) in the root purple outer phloem (POP) across all the pairwise transcriptome comparisons between POP and non-purple inner phloem (NPIP).
Gene ID	Position			Description *
	CHR	Start	End
DCAR_000809	Chr1	3100721	3102085	Probable WRKY transcription factor 50 (WRKY DNA-binding protein 50)
DCAR_001079	Chr1	10216453	10217848	Myb-related protein 330
DCAR_002189	Chr1	26751432	26755169	Protein NLP7 (AtNLP7) (NIN-like protein 7) (Nodule inception protein-like protein 7)
DCAR_002739	Chr1	32455171	32460366	Basic helix-loop-helix protein A
DCAR_003717	Chr1	41385308	41386955	Anthocyanin regulatory C1 protein
DCAR_004233	Chr1	45900611	45903433	WRKY transcription factor 6 (WRKY DNA-binding protein 6) (AtWRKY6)
DCAR_004997	Chr2	2781031	2781929	Ethylene-responsive transcription factor 5 (Ethylene-responsive element-binding factor 4) (EREBP-4) (Ethylene-responsive element-binding factor 5 homolog) (NsERF4)
DCAR_005034	Chr2	3605438	3606931	Probable WRKY transcription factor 41 (WRKY DNA-binding protein 41)
DCAR_005083	Chr2	6117651	6120150	Probable WRKY transcription factor 71 (WRKY DNA-binding protein 71)
DCAR_005143	Chr2	7327523	7328766	Probable WRKY transcription factor 65 (WRKY DNA-binding protein 65)
DCAR_005574	Chr2	15233460	15234822	WRKY transcription factor 22 (WRKY DNA-binding protein 22)
DCAR_006987	Chr2	30572026	30573756	Transcription factor bHLH28 (Basic helix-loop-helix protein 28) (AtbHLH28) (bHLH 28) (Transcription factor EN 40) (bHLH transcription factor bHLH028)
DCAR_007495	Chr2	34767004	34772569	Protein NUCLEAR FUSION DEFECTIVE 4 {ECO:0000303|PubMed:16698901}
DCAR_007815	Chr2	37302161	37304416	Probable WRKY transcription factor 35 (WRKY DNA-binding protein 35)
DCAR_007860	Chr2	37749741	37750799	Ethylene-responsive transcription factor ERF109
DCAR_008430	Chr2	42076242	42078947	Homeobox protein knotted-1-like 7 (Protein IRREGULAR XYLEM 11) (Protein KNAT7)
DCAR_009227	Chr3	5612201	5614363	Transcription factor AS1 (Myb-related protein 91) (AtMYB91) (Protein ASYMMETRIC LEAVES 1) (Protein PHANTASTICA) (AtPHAN)
DCAR_010894	Chr3	30151464	30152245	Heat shock factor protein HSF24 (Heat shock transcription factor 24) (HSTF 24) (Heat stress transcription factor)
DCAR_011967	Chr3	42498756	42502433	Putative transcription factor bHLH041 (Basic helix-loop-helix protein 41) (AtbHLH41) (bHLH 41) (Transcription factor EN 51) (bHLH transcription factor bHLH041)
DCAR_012015	Chr3	42960408	42961766	Transcription factor RAX2 (Myb-related protein 38) (AtMYB38) (Protein REGULATOR OF AXILLARY MERISTEMS 2)
DCAR_012548	Chr3	48190456	48192852	Myb-related protein Myb4 (OsMyb4) (Transcription factor RLTR1)
DCAR_016030	Chr4	2086345	2086722	Fasciclin-like arabinogalactan protein 10 (Precursor)
DCAR_015475	Chr4	11691280	11694404	Uncharacterized protein At1g04910
DCAR_015358	Chr4	13060880	13064772	Dehydration-responsive element-binding protein 2C (Protein DREB2C)
DCAR_015002	Chr4	16426186	16428272	Transcription factor RAX2 (Myb-related protein 38) (AtMYB38) (Protein REGULATOR OF AXILLARY MERISTEMS 2)
DCAR_013728	Chr4	27892053	27894935	Myb-related protein Myb4 (OsMyb4) (Transcription factor RLTR1)
DCAR_013625	Chr4	28741714	28746502	Acetyl-coenzyme A carboxylase carboxyl transferase subunit alpha, chloroplastic (ACCase subunit alpha) (Acetyl-CoA carboxylase carboxyltransferase subunit alpha) (6.4.1.2) (Precursor)
DCAR_013325	Chr4	31023716	31025842	O-acyltransferase WSD1 (Diacylglycerol O-acyltransferase) (DGAT) (2.3.1.20) (Long-chain-alcohol O-fatty-acyltransferase) (2.3.1.75) (Wax synthase) (WS)
DCAR_012878	Chr4	34568561	34570410	Cytochrome P450 71D11 (1.14.-.-) (Fragment)
DCAR_016339	Chr5	2330337	2332318	Ethylene-responsive transcription factor ERF115
DCAR_016858	Chr5	8439334	8441547	NAC domain-containing protein 100 (ANAC100) (AtNAC5)
DCAR_017032	Chr5	10727067	10730210	Transcription factor bHLH130 (Basic helix-loop-helix protein 130) (AtbHLH130) (bHLH 130) (Transcription factor EN 69) (bHLH transcription factor bHLH130)
DCAR_017673	Chr5	22226323	22229683	Transcription factor RAX1 (Myb-related protein 37) (AtMYB37) (Protein REGULATOR OF AXILLARY MERISTEMS 1)
DCAR_018481	Chr5	30483119	30484602	Myb-related protein Myb4 (OsMyb4) (Transcription factor RLTR1)
DCAR_019267	Chr5	37505657	37508132	WRKY transcription factor 6 (WRKY DNA-binding protein 6) (AtWRKY6)
DCAR_019469	Chr5	39338310	39339958	NAD(P)H-quinone oxidoreductase subunit K, chloroplastic {ECO:0000255|HAMAP-Rule:MF_01356} (1.6.5.- {ECO:0000255|HAMAP-Rule:MF_01356}) (NAD(P)H dehydrogenase subunit K {ECO:0000255|HAMAP-Rule:MF_01356}) (NADH-plastoquinone oxidoreductase subunit K {ECO:0000255|HAMAP-Rule:MF_01356})
DCAR_019758	Chr5	41546934	41548967	WRKY transcription factor 6 (WRKY DNA-binding protein 6) (AtWRKY6)
DCAR_021919	Chr6	18478457	18480446	Transcription factor bHLH25 (Basic helix-loop-helix protein 25) (AtbHLH25) (bHLH 25) (Transcription factor EN 29) (bHLH transcription factor bHLH025)
DCAR_021580	Chr6	21699173	21700715	Transcription factor MYB86 (Myb homolog 4) (AtMyb4) (Myb-related protein 86) (AtMYB86)
DCAR_021251	Chr6	24687978	24693207	Transcription factor bHLH120 (Basic helix-loop-helix protein 120) (AtbHLH120) (bHLH 120) (Transcription factor EN 4) (bHLH transcription factor bHLH120)
DCAR_019896	Chr6	35934254	35937203	NAC domain-containing protein 100 (ANAC100) (AtNAC5)
DCAR_023758	Chr7	5008152	5013553	LRR receptor-like serine/threonine-protein kinase GSO1 (2.7.11.1) (Protein GASSHO 1) (Precursor)
DCAR_024663	Chr7	17794344	17796446	Probable WRKY transcription factor 75 (WRKY DNA-binding protein 75)
DCAR_026126	Chr7	33364051	33365869	Transcription factor bHLH36 (Basic helix-loop-helix protein 36) (AtbHLH36) (bHLH 36) (Transcription factor EN 6) (bHLH transcription factor bHLH036)
DCAR_028312	Chr8	9013410	9014567	Transcription repressor MYB5 (AtM2) (Myb-related protein 5) (AtMYB5)
DCAR_028146	Chr8	14422378	14423688	Transcription factor MYB39 (Myb-related protein 39) (AtMYB39)
DCAR_027996	Chr8	16474701	16477012	Putative Myb family transcription factor At1g14600
DCAR_027970	Chr8	16764089	16765385	Heat stress transcription factor A-4c (AtHsfA4c) (AtHsf-20) (Protein ROOT HANDEDNESS 1)
DCAR_027713	Chr8	20266332	20268600	Probable WRKY transcription factor 41 (WRKY DNA-binding protein 41)
DCAR_027706	Chr8	20315655	20317286	Ethylene-responsive transcription factor ERF061
DCAR_027275	Chr8	24534264	24536526	Transcription factor bHLH92 (Basic helix-loop-helix protein 92) (AtbHLH92) (bHLH 92) (Transcription factor EN 22) (bHLH transcription factor bHLH092)
DCAR_026990	Chr8	26935336	26937119	Probable WRKY transcription factor 23 (WRKY DNA-binding protein 23)
DCAR_026970	Chr8	27115369	27117012	Transcription factor MYB108 (Myb-related protein 108) (AtMYB108) (Protein BOTRYTIS-SUSCEPTIBLE 1)
DCAR_026771	Chr8	28850108	28851014	Uncharacterized protein At1g66480
DCAR_030168	Chr9	21694361	21695905	Transcription factor MYB108 (Myb-related protein 108) (AtMYB108) (Protein BOTRYTIS-SUSCEPTIBLE 1)
DCAR_030745	Chr9	29370358	29373022	Myb-related protein Myb4 (OsMyb4) (Transcription factor RLTR1)
DCAR_000675	Chr1	1386923	1388813	Zinc finger CCCH domain-containing protein 17 (AtC3H17)
DCAR_001474	Chr1	15799442	15801192	Agamous-like MADS-box protein AGL12 {ECO:0000305} (Protein XAANTAL 1 {ECO:0000303|PubMed:18203871})
DCAR_001795	Chr1	20802264	20807922	Transcription factor bHLH155 (BHLH transcription factor gamma) (bHLH gamma) (Basic helix-loop-helix protein 155) (AtbHLH155) (bHLH 155) (LONESOME HIGHWAY-like protein 3) (bHLH transcription factor bHLH155)
DCAR_002041	Chr1	24466580	24471702	Putative lysine-specific demethylase JMJD5 (1.14.11.-) (JmjC domain-containing protein 30) (AtJMJ30) (Jumonji domain-containing protein 5) (AtJMJD5)
DCAR_004549	Chr1	49155266	49157424	Basic leucine zipper 9 (AtbZIP9) (bZIP protein 9) (Basic leucine zipper OPAQUE 2 homolog 2) (Basic leucine zipper O2 homolog 2)
DCAR_006979	Chr2	30493652	30494796	Dof zinc finger protein DOF4.6 (AtDOF4.6)
DCAR_008097	Chr2	39480046	39484265	Universal stress protein A-like protein
DCAR_009660	Chr3	9779706	9781579	Myb family transcription factor APL (AtAPL) (Protein ALTERED PHLOEM DEVELOPMENT)
DCAR_017713	Chr5	22839439	22840174	Homeobox-leucine zipper protein HAT7 (HD-ZIP protein ATHB-3) (Homeodomain transcription factor ATHB-3) (Homeodomain-leucine zipper protein HAT7) (HD-ZIP protein 7)
DCAR_017856	Chr5	24181486	24183510	Transcription factor PCL1 (Protein PHYTOCLOCK 1 homolog) (OsPCL1)
DCAR_022336	Chr6	13973194	13975166	Trihelix transcription factor ASIL2 {ECO:0000305} (6B-interacting protein 1-like 2 {ECO:0000303|PubMed:21330492}) (Trihelix DNA-binding protein ASIL2 {ECO:0000305})
DCAR_019908	Chr6	35858709	35860309	Myb family transcription factor APL (AtAPL) (Protein ALTERED PHLOEM DEVELOPMENT)
DCAR_019886	Chr6	36007805	36009520	Myb family transcription factor APL (AtAPL) (Protein ALTERED PHLOEM DEVELOPMENT)
DCAR_025068	Chr7	22629324	22630603	Ethylene-responsive transcription factor 2 (NtERF2) (Ethylene-responsive element-binding factor 2) (EREBP-2)
DCAR_030483	Chr9	25832884	25834291	Heat stress transcription factor C-1a (Heat stress transcription factor 13) (rHsf13) (Heat stress transcription factor 2) (OsHsf-02)
* Subject descriptions are the top Blastp hits in the Swiss-Prot database

## Sheet: ST8
Supplementary Table S8. Carrot DEGs belonging to the MYB, bHLH, Ethylene-responsive (ERF), NAC and WRKY transcription factor families consistenlty upregulated (in red) or downregulated (in green) in POP tissues across all the POP vs. NPIP transcriptome comparisons.
	Gene_ID	TF family	Position
			Chromosome	Start	End
	DCAR_001079	MYB	Chr1	10216453	10217848
	DCAR_003717	MYB	Chr1	41385308	41386955
	DCAR_009227	MYB	Chr3	5612201	5614363
	DCAR_012015	MYB	Chr3	42960408	42961766
	DCAR_012548	MYB	Chr3	48190456	48192852
	DCAR_013728	MYB	Chr4	27892053	27894935
	DCAR_015002	MYB	Chr4	16426186	16428272
	DCAR_017673	MYB	Chr5	22226323	22229683
	DCAR_018481	MYB	Chr5	30483119	30484602
	DCAR_021580	MYB	Chr6	21699173	21700715
	DCAR_026970	MYB	Chr8	27115369	27117012
	DCAR_028146	MYB	Chr8	14422378	14423688
	DCAR_028312	MYB	Chr8	9013410	9014567
	DCAR_030168	MYB	Chr9	21694361	21695905
	DCAR_030745	MYB	Chr9	29370358	29373022
	DCAR_009660	MYB	Chr3	9779706	9781579
	DCAR_019886	MYB	Chr6	36007805	36009520
	DCAR_019908	MYB	Chr6	35858709	35860309
	DCAR_002739	bHLH (DcbHLH3)	Chr1	32455171	32460366
	DCAR_006987	bHLH	Chr2	30572026	30573756
	DCAR_011967	bHLH	Chr3	42498756	42502433
	DCAR_017032	bHLH	Chr5	10727067	10730210
	DCAR_021251	bHLH	Chr6	24687978	24693207
	DCAR_021919	bHLH	Chr6	18478457	18480446
	DCAR_001795	bHLH	Chr1	20802264	20807922
	DCAR_004997	ERF	Chr2	2781031	2781929
	DCAR_007860	ERF	Chr2	37749741	37750799
	DCAR_015358	ERF	Chr4	13060880	13064772
	DCAR_016339	ERF	Chr5	2330337	2332318
	DCAR_027706	ERF	Chr8	20315655	20317286
	DCAR_025068	ERF	Chr7	22629324	22630603
	DCAR_016858	NAC	Chr5	8439334	8441547
	DCAR_019896	NAC	Chr6	35934254	35937203
	DCAR_004233	WRKY	Chr1	45900611	45903433
	DCAR_005143	WRKY	Chr2	7327523	7328766
	DCAR_019758	WRKY	Chr5	41546934	41548967
	DCAR_000809	WRKY	Chr1	3100721	3102085
	DCAR_005034	WRKY	Chr2	3605438	3606931
	DCAR_005083	WRKY	Chr2	6117651	6120150
	DCAR_005574	WRKY	Chr2	15233460	15234822
	DCAR_007815	WRKY	Chr2	37302161	37304416
	DCAR_019267	WRKY	Chr5	37505657	37508132
	DCAR_024663	WRKY	Chr7	17794344	17796446
	DCAR_026990	WRKY	Chr8	26935336	26937119
	DCAR_027713	WRKY	Chr8	20266332	20268600
	Genes in bold letters are phylogenetically related to TFs (of the same TF family) from other species known to be involved in the transcriptional regulation of anthocyanins. Carrot genes previously reported are denoted in blue with their previous denomination.

## Sheet: ST9
Supplementary Table S9. MYB, bHLH, ERF, NAC and WRKY transcription factor gene sequences from different plant species used for phylogenetic analysis
Gene ID	TF family	GenBank accession number	Species
Am330	MYB	P81395	Antirrhinum majus
AmR1	MYB	ABB83826	Antirrhinum majus
AmR2	MYB	ABB83827	Antirrhinum majus
AmV	MYB	ABB83828	Antirrhinum majus
At113	MYB	Q9FNV9	Arabidopsis thaliana
At114	MYB	Q9FNV8	Arabidopsis thaliana
At12	MYB	ABB03913	Arabidopsis thaliana
At32	MYB	EFH43356	Arabidopsis thaliana
At4	MYB	NP_195574	Arabidopsis thaliana
At6	MYB	NP_192684	Arabidopsis thaliana
At7	MYB	NP_179263	Arabidopsis thaliana
At8	MYB	NP_849749	Arabidopsis thaliana
At60	MYB	AAC83617.1	Arabidopsis thaliana
At75	MYB	AAG42001	Arabidopsis thaliana
At90	MYB	AAG42002	Arabidopsis thaliana
AtTT2	MYB	NP_198405	Arabidopsis thaliana
CsR	MYB	AFB73913	Citrus sinensis
Dk4	MYB	BAI49721	Diospyros kaki
Eg1	MYB	CAE09058	Eucaliptus gunnii
EsA1	MYB	AGT39060	Epimedium sagittatum
Fa11	MYB	AFL02461	Fragaria × ananassa
Fa9	MYB	AFL02460	Fragaria × ananassa
Gh10	MYB	CAD87010	Gerbera hybrid
Gm10	MYB	ACM62751	Garcinia mangostana
Ib1	MYB	BAF45114	Ipomoea batatas
In2	MYB	BAE94709	Ipomoea nil
Le1	MYB	AAQ55181	Solanum lycopersicum
Lh6	MYB	BAJ05399	Lilium hybrid
Lj2a	MYB	BAG12893	Lotus japonicus
Md6	MYB	DQ074461	Malus × domestica
Md10a	MYB	ABB84753	Malus × domestica
Md1 1	MYB	DQ886414	Malus × domestica
Mr1	MYB	ADG21957	Myrica rubra
Nt2	MYB	ACO52470	Nicotiana tabacum
Os3	MYB	BAA23339	Oryza sativa
Ph2	MYB	AAF66727	Petunia hybrida
Ph27	MYB	KF985023	Petunia hybrida
Pv4	MYB	AEM17348	Panicum virgatum
Sl12	MYB	ACB46530	Solanum lycopersicum
Vva4	MYB	ABL61515	Vitis vinifera
Vv4b	MYB	ACN94269	Vitis vinifera
Vv5a	MYB	AAS68190	Vitis vinifera
Vv5b	MYB	AAX51291	Vitis vinifera
VvA1	MYB	BAD18977	Vitis vinifera
VvA2	MYB	BAD18978	Vitis vinifera
Vv2L2	MYB	ACX50288	Vitis vinifera
Vv2L3	MYB	KMO46932	Vitis vinifera
VvF1	MYB	ACV81697	Vitis vinifera
VvPA1	MYB	CAJ90831	Vitis vinifera
VvPA2	MYB	ACK56131	Vitis vinifera
Zm31	MYB	NP_001105949	Zea mays
Zm42	MYB	NP_01106009	Zea mays
AmtMYB	MYB	XM_006833257.3	Amborella trichopoda
AmDEL	bHLH	AAA32663	Antirrhinum majus
AtTT8	bHLH	CAC14865.1	Arabidopsis thaliana
AtGL3	bHLH	NP_680372	Arabidopsis thaliana
AtEGL3	bHLH	NP_176552	Arabidopsis thaliana
AtMUTE	bHLH	NP_187263.1	Arabidopsis thaliana
AtFAMA	bHLH	NP_189056.2	Arabidopsis thaliana
AtSPCH	bHLH	NP_200133.2	Arabidopsis thaliana
AtFIT	bHLH	NP_850114.1	Arabidopsis thaliana
AtICE	bHLH	NP_189309.2	Arabidopsis thaliana
AtPIF1	bHLH	NP_849996.1	Arabidopsis thaliana
AtHFR1	bHLH	NP_563650.1	Arabidopsis thaliana
AtSPATULA	bHLH	NP_568010.1	Arabidopsis thaliana
AtAlctraz	bHLH	NP_201512.1	Arabidopsis thaliana
AtUNE10	bHLH	NP_191916.3	Arabidopsis thaliana
AtBEE1	bHLH	NP_173276.2	Arabidopsis thaliana
AtCIB1	bHLH	NP_195179.2	Arabidopsis thaliana
AtbHLH083	bHLH	AEE34512.1	Arabidopsis thaliana
AtbHLH086	bHLH	NP_198596.1	Arabidopsis thaliana
AtbHLH054	bHLH	NP_564293.1	Arabidopsis thaliana
AtbHLH139	bHLH	NP_680385.1	Arabidopsis thaliana
AtbHLH025	bHLH	NP_195498.3	Arabidopsis thaliana
AtbHLH018	bHLH	NP_001324634.1	Arabidopsis thaliana
AtbHLH019	bHLH	NP_179861.2	Arabidopsis thaliana
AtbHLH020	bHLH	NP_850031.2	Arabidopsis thaliana
FaSPT	bHLH	AY679615	Fragaria x ananassa
InDEL	bHLH	BAE94393	Ipomoea nil
InIVS	bHLH	BAE94394	Ipomoea nil
IpIVS	bHLH	BAD18982.1	Ipomoea purpurea
OsbHLH49	bHLH	XP_015623756.1	Oryza sativa
OsBP-5	bHLH	XP_015618074.1	Oryza sativa
OsbHLH019	bHLH	AAM27466.1	Oryza sativa
PhAN1	bHLH	AAG25927	Petunia hybrida
PhJAF13	bHLH	AAC39455	Petunia hybrida
TaIC41	bHLH	ACB69501.1	Trititum aestivum
ZmIN1	bHLH	AAB03841	Zea mays
ZmR	bHLH	NP_0011053392	Zea mays
AmtbHLH	bHLH	NP_001292767.1	Amborella trichopoda
MdERF1B	ERF	XP_008341120.2	Malus domestica
AaERF1	ERF	AEQ93554.1	Artemisia annua
AmtERF1	ERF	W1PES3	Amborella trichopoda
LePti4	ERF	NP_001334005.1	Solanum lycopersicum
MdERF2	ERF	BAF43420.1	Malus domestica
AtERF2	ERF	NP_199533.1	Arabidopsis thaliana
LePti5 (	ERF	AAC49740.1	Solanum lycopersicum
AtORA59	ERF	NP_172106.1	Arabidopsis thaliana
AtERF1	ERF	NP_188965.1	Arabidopsis thaliana
MdERF1B	ERF	XP_008341120.2	Malus domestica
AaERF2	ERF	AEQ93555.1	Artemisia annua
MdERF5	ERF	NP_001315812.1	Malus domestica
AtERF5	ERF	NP_568679.1	Arabidopsis thaliana
AtERF6	ERF	NP_567529.1	Arabidopsis thaliana
AtRAP2.1	ERF	ABD57516.1	Arabidopsis thaliana
AtRAP2.10	ERF	NP_195408.1	Arabidopsis thaliana
AtDREB1B	ERF	BAA33435.1	Arabidopsis thaliana
AtDREB2A	ERF	NP_001031837.1	Arabidopsis thaliana
AtDREB2B	ERF	NP_187713.1	Arabidopsis thaliana
AtABR1	ERF	NP_201280.1	Arabidopsis thaliana
PyERF3	ERF	ASY06613.1	Pyrus x bretschneideri
MdERF1	ERF	BAF43419.1	Malus domestica
AtRAP2.2	ERF	NP_850583.1	Arabidopsis thaliana
AtRAP2.12	ERF	NP_001077718.1	Arabidopsis thaliana
AtERF10	ERF	NP_171876.1	Arabidopsis thaliana
AtERF11	ERF	NP_174159.2	Arabidopsis thaliana
AtERF4	ERF	NP_188139.1	Arabidopsis thaliana
AtERF8	ERF	NP_175725.1	Arabidopsis thaliana
NtERF4	ERF	NP_001312182.1	Nicotiana tabacum
AtERF3	ERF	NP_175479.1	Arabidopsis thaliana
AtERF7	ERF	NP_188666.1	Arabidopsis thaliana
AtRAV1	ERF	NP_172784.1	Arabidopsis thaliana
AtRAV2	ERF	NP_001185352.1	Arabidopsis thaliana
AtRAP2.7	ERF	NP_001189625	Arabidopsis thaliana
AtAP2	ERF	NP_195410.1	Arabidopsis thaliana
EjAP2-1	ERF	AKN10311.1	Eriobotrya japonica
CpNAC1	NAC	ANE09912.1	Carica papaya
MaNAC	NAC	ADK37922.1	Musa acuminata
SlNAC48/SNAC4	NAC	AGT56012.1	Solanum lycopersicum
PpNAC1	NAC	ALK27820.1	Prunus persica
SlNAC-NOR	NAC	AAU43923.2	Solanum lycopersecum
BnaNAC56	NAC	AIS36128.1	Brassica napus
HbNAC1	NAC	AHF27222.1	Hevea brasiliensis
SlNAM1	NAC	ACL14371.1	Solanum lycopersicum
EjNAC3	NAC	ATU79664.1	Eriobotrya japonica
SlNAC2	NAC	NM_001329523.1	Solanum lycopersicum
SlNAC4	NAC	AGH20611.1	Solanum lycopersicum
SlNAC3	NAC	AFD22355.1	Solanum lycopersicum
RhNAC2	NAC	AFQ21786.1	Rosa hybrida
AtJUB1	NAC	AAD22369.1	Arabidopsis thaliana
OsNAC6	NAC	BAA89800.1	Oryza sativa
ATAF2	NAC	BAC43493.1	Arabidopsis thaliana
AtNAC91	NAC	AAN72023.1	Arabidopsis thaliana
ATAF1	NAC	ABD19694.1	Arabidopsis thaliana
CaNAC1	NAC	AAW48094.1	Capsicum annuum
GmNAC4	NAC	AAX85981.1	Glycine max
GmNAC3	NAC	NM_001251305.1	Glycine max
GmNAC2	NAC	NM_001249942.2	Glycine max
SlNAC1	NAC	NM_001247553.3	Solanum lycopersicum
OsNAC1	NAC	BAC53810.1	Oryza sativa
StNAC	NAC	CAC42087.1	Solanum tuberosum
EjNAC1	NAC	AJS13774.1	Eriobotrya japonica
ONAC020	NAC	APH07720.1	Oryza sativa
ONAC023	NAC	APH07727.1	Oryza sativa
AtXND1	NAC	NM_001345642.1	Arabidopsis thaliana
ONAC026	NAC	APH07726.1	Oryza sativa
AtBRN1	NAC	NM_103057.4	Arabidopsis thaliana
AtBRN2	NAC	NM_117103.3	Arabidopsis thaliana
AtFEZ	NAC	NM_102451.2	Arabidopsis thaliana
AtNAC010	NAC	NM_102615.3	Arabidopsis thaliana
AtNST3	NAC	NM_103011.2	Arabidopsis thaliana
AtNAM	NAC	NM_104166.3	Arabidopsis thaliana
AtCUC3	NAC	NM_106292.3	Arabidopsis thaliana
AtNST1	NAC	NM_130243.3	Arabidopsis thaliana
AtCUC1	NAC	NM_112380.3	Arabidopsis thaliana
AtNAC2	NAC	NM_112419.4	Arabidopsis thaliana
AtNST2	NAC	NM_116056.2	Arabidopsis thaliana
AtSND2	NAC	NM_118992.3	Arabidopsis thaliana
AtNAC075	NAC	NM_119067.2	Arabidopsis thaliana
AtVNI1	NAC	NM_001085082.1	Arabidopsis thaliana
AtVNI2	NAC	BAH56900.1	Arabidopsis thaliana
AtCUC2	NAC	NM_124774.3	Arabidopsis thaliana
PhNAM	NAC	CAA63101.1	Petunia hybrida
OsNAC2	NAC	BAC53811.1	Oryza sativa
AtSMB	NAC	NM_001334893.1	Arabidopsis thaliana
RhNAC100	NAC	AFS95065.1	Rosa hybrida
GhNAC25	NAC	AHJ79166.1	Gossypium hirsutum
AtNAP	NAC	NM_105616.4	Arabidopsis thaliana
LcNAC13	NAC	AQP31369.1	Litchi chinensis
CitNAC	NAC	ABM67699.1	Citrus sinensis
AtANAC046	NAC	EFH60684.1	Arabidopsis thaliana
SlNAC2	NAC	ALX18625.1	Solanum lycopersecum
AtNAC29	NAC	NM_105616.4	Arabidopsis thaliana
AtORS1	NAC	NM_113825.4	Arabidopsis thaliana
AtORE1	NAC	NM_123323.3	Arabidopsis thaliana
GmNAC5	NAC	NM_001249957.1	Glycine max
GmNAC1	NAC	NM_001249926.1	Glycine max
PvNAP	NAC	XM_007158582.1	Phaseolus vulgaris
AmNAC	NAC	XP_006843116.1	Amborella trichopoda
AtTTG2	WRKY	NP_001323504.1	Arabidopsis thaliana
PhPH3	WRKY	AMR43368.1	Petunia hybrida
BnTTG2	WRKY	AJD07412	Brassica napus
AtWRKY2	WRKY	AT5G56270	Arabidopsis thaliana
AtWRKY4	WRKY	AT1G13960	Arabidopsis thaliana
AtWRKY6	WRKY	AT1G62300	Arabidopsis thaliana
AtWRKY7	WRKY	AT4G24240	Arabidopsis thaliana
AtWRKY18	WRKY	AT4G31800	Arabidopsis thaliana
AtWRKY23	WRKY	AT2G47260	Arabidopsis thaliana
AtWRKY35	WRKY	AT2G34830	Arabidopsis thaliana
AtWRKY36	WRKY	AT1G69810	Arabidopsis thaliana
AtWRKY42	WRKY	AT4G04450	Arabidopsis thaliana
AtWRKY62	WRKY	AT5G01900	Arabidopsis thaliana
AtWRKY70	WRKY	AT3G56400	Arabidopsis thaliana
AtTTG2	WRKY	AT2G37260	Arabidopsis thaliana
VpWRKY1	WRKY	ACY69975	Vitis pseudoreticulata
VpWRKY2	WRKY	ADD70008	Vitis pseudoreticulata
VpWRKY3	WRKY	AEN71143	Vitis pseudoreticulata
VvWRKY01	WRKY	AAT46067	Vitis vinifera
VtWRKY11	WRKY	B2G283	Vitis thunbergii
VvWRKY33	WRKY	AHG99400	Vitis vinifera
GhWRKY3	WRKY	ADI52618.1	Gossypium hirsutum
PcWRKY1	WRKY	AAD55974.1	Petroselinum crispum
PcWRKY3	WRKY	AAC49528	Petroselinum crispum
PcWRKY4	WRKY	AAG35658	Petroselinum crispum
OsWRKY6	WRKY	DAA05071	Oryza sativa
OsWRKY76	WRKY	DAA05141	Oryza sativa
WIZZ	WRKY	BAA87058.1	Nicotiana tabacum
CaWRKY1	WRKY	AAO86686	Capsicum annuum
CjWRKY1	WRKY	BAF41990).	Coptis japonica
AmtWRKY	WRKY	XP_006841629.1	Amborella trichopoda
VvWRKY26	WRKY	AQM37647.1	Vitis vinifera

[truncated: 2 more sheets: ST10, ST11]
